# Safety of Perioperative Glucocorticoids in Elective Noncardiac Surgery

## A Systematic Review and Meta-analysis

Andrew J. Toner, F.R.C.A., Vyhunthan Ganeshanathan, F.R.C.A., Matthew T. Chan, F.A.N.Z.C.A., Kwok M. Ho, Ph.D., Tomas B. Corcoran, M.D. (Res.)

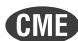

This article has been selected for the ANESTHESIOLOGY CME Program. Learning objectives and disclosure and ordering information can be found in the CME section at the front of this issue.

### ABSTRACT

**Background:** Glucocorticoids are increasingly used perioperatively, principally to prevent nausea and vomiting. Safety concerns focus on the potential for hyperglycemia and increased infection. The authors hypothesized that glucocorticoids predispose to such adverse outcomes in a dose-dependent fashion after elective noncardiac surgery.

**Methods:** The authors conducted a systematic literature search of the major medical databases from their inception to April 2016. Randomized glucocorticoid trials in adults specifically reporting on a safety outcome were included and meta-analyzed with Peto odds ratio method or the quality effects model. Subanalyses were performed according to a dexamethasone dose equivalent of low (less than 8 mg), medium (8 to 16 mg), and high (more than 16 mg). The primary endpoints of any wound infection and peak perioperative glucose concentrations were subject to meta-regression.

**Results:** Fifty-six trials from 18 countries were identified, predominantly assessing dexamethasone. Glucocorticoids did not impact on any wound infection (odds ratio, 0.8; 95% CI, 0.6 to 1.2) but did result in a clinically unimportant increase in peak perioperative glucose concentration (weighted mean difference, 20.0 mg/dl; CI, 11.4 to 28.6;  $P < 0.001$  or 1.1 mM; CI, 0.6 to 1.6). Glucocorticoids reduced peak postoperative C-reactive protein concentrations (weighted mean difference, -22.1 mg/l; CI, -31.7 to -12.5;  $P < 0.001$ ), but other adverse outcomes and length of stay were unchanged. No dose-effect relationships were apparent.

**Conclusions:** The evidence at present does not highlight any safety concerns with respect to the use of perioperative glucocorticoids and subsequent infection, hyperglycemia, or other adverse outcomes. Nevertheless, collated trials lacked sufficient surveillance and power to detect clinically important differences in complications such as wound infection. (ANESTHESIOLOGY 2017; 126:234-48)

WE are witnessing an exponential growth in the perioperative use of glucocorticoids for an expanding number of indications. When used in cardiac surgery patients, they improve pulmonary function, decrease rates of atrial fibrillation, and reduce the incidence of infection.<sup>1,2</sup> In hip and knee surgery, they are recommended to confer analgesic benefit,<sup>3</sup> and they decrease sore throat in intubated patients<sup>4,5</sup> and swelling in maxillofacial surgery.<sup>6</sup> The principal anesthesia indication is in the prevention of postoperative nausea and vomiting.<sup>7</sup>

Glucocorticoids are not, however, without harm.<sup>8</sup> They are associated with atypical or opportunistic infections in either short-term high-dose or chronic long-term (more than 21 days) administration. Recognized complications include hyperglycemia, psychosis, peptic ulceration, and poor bone healing.<sup>9,10</sup> Although high-quality studies have shown glucocorticoid use in cardiac surgery to be both beneficial and

#### What We Already Know about This Topic

- Glucocorticoids are commonly given to prevent nausea and vomiting
- However, glucocorticoids are immunosuppressive and may promote infection
- The authors conducted a meta-analysis of 56 trials ( $n = 5,607$ ) that evaluated infection, hospital duration, and intraoperative glucose concentration

#### What This Article Tells Us That Is New

- Glucocorticoids did not impact on any wound infection (odds ratio, 0.84; 95% CI, 0.62 to 1.15) or length of stay (weighted mean difference, -0.27 days; CI, -1.37 to 0.84)
- Glucocorticoids slightly increased peak postoperative glucose concentrations by 20 mg/dl (CI, 11 to 29;  $P < 0.001$ ), an amount that is probably not clinically important
- Single-dose steroid administration for prevention of nausea appears safe

This article is featured in "This Month in Anesthesiology," page 1A. This article has an audio podcast.

Submitted for publication June 9, 2016. Accepted for publication October 26, 2016. From the Department of Anaesthesia and Pain Medicine, Royal Perth Hospital, Perth, Western Australia, Australia (A.J.T., V.G., T.B.C.); Department of Anaesthesia and Intensive Care, The Chinese University of Hong Kong, Hong Kong (M.T.C.); Department of Intensive Care Medicine, Royal Perth Hospital, Perth, Western Australia, Australia (K.M.H.); School of Population Health, University of Western Australia, Perth, Western Australia, Australia (K.M.H.); School of Veterinary and Life Sciences, Murdoch University, Perth, Western Australia, Australia (K.M.H.); School of Medicine and Pharmacology, University of Western Australia, Perth, Western Australia, Australia (T.B.C.); and School of Public Health and Preventive Medicine, Monash University, Melbourne, Victoria, Australia (T.B.C.).

Copyright © 2016, the American Society of Anesthesiologists, Inc. Wolters Kluwer Health, Inc. All Rights Reserved. Anesthesiology 2017; 126:234-48

safe,<sup>1</sup> there are three major safety concerns regarding the perioperative use of glucocorticoids in noncardiac surgical patients, including a possible increase in the risk of (1) hyperglycemia, (2) infection, and (3) perioperative bleeding.<sup>9–11</sup> None of the published trials in this field are of sufficient size to have adequate power to detect a meaningful effect upon these outcomes,<sup>12</sup> and there is a need to examine these questions with a meta-analysis. We, therefore, hypothesized that important adverse outcomes are related to the use of perioperative glucocorticoids, principally the occurrence of postoperative wound infection and hyperglycemia, and these relationships are dose-dependent.

## Materials and Methods

### Systematic Literature Search

This meta-analysis was registered with the International Prospective Register of Systematic Reviews (PROSPERO 2016: CRD42016038280, <http://www.crd.york.ac.uk/PROSPERO>). We conducted a systematic literature search of MEDLINE and EMBASE *via* Ovid, PubMed, CINAHL, the Cochrane controlled trial register, and Web of Science from database inception to April 2, 2016. Each database was searched separately to improve functionality and to allow mapping to relevant subject headings. The strategy used validated methods of the Cochrane Collaboration and the Preferred Reporting Items for Systematic Reviews and Meta-analyses statement.<sup>13</sup> Search terms included combinations of the Medical Subject Headings: dexamethasone, methylprednisolone, glucocorticoid, steroid, perioperative period, perioperative care, and combinations with the key words: surgery, wound infection, surgical-site infection, pneumonia, infection, sepsis, sept\*, pyrexia, febrile, C-reactive protein (CRP), wound dehiscence, anastomotic leak, blood glucose, hyperglycemia, malignancy, cancer, neoplasm, bleeding, hemorrhage, mortality, and death. Subject headings were exploded to include all relevant subheadings. Search limits included randomized trials, systematic reviews, and meta-analyses in adults (18 yr and older). There were no language restrictions. Two researchers (A.J.T. and V.G.) independently screened the articles by their titles and abstracts to identify studies specifically reporting on the primary outcomes of any wound infection or blood glucose concentration, as well as secondary outcomes relevant to an assessment of safety. The full text of these articles and the gray literature were then screened according to fixed eligibility criteria.

### Study Selection, Data Extraction, and Quality Assessment

Published and unpublished studies that met all of the following criteria were eligible for inclusion: (1) randomized controlled trial; (2) evaluation of single or repeated doses of intravenous glucocorticoid against placebo, with the first dose commencing preoperatively or intraoperatively; (3) study population underwent elective noncardiac surgery; (4) the studies quantitatively defined at least one predetermined safety outcome as an endpoint and reported this in

Results; and (5) an English translation of foreign language studies was available through our institutional library. The predetermined primary outcomes were any wound infection and blood glucose concentrations, and the secondary outcomes included wound healing, anastomotic leak, inflammatory response (as determined by CRP concentrations), length of stay, bleeding, and any other infection. Studies that reported no adverse effects or complications in either group were excluded unless systematic postoperative screening had taken place. Statements such as “no adverse events occurred” were insufficient in isolation to warrant inclusion. Reference lists of included articles were hand searched, and relevant trials were subjected to the same criteria.

Two researchers (A.J.T. and V.G.) independently examined and recorded trial characteristics and outcomes, using a predesigned data abstraction form. This abstraction form was used to record information regarding the quality of the trial such as allocation concealment, randomization, blinding, exclusion criteria, and systematic outcome measurement. The grading of allocation concealment was based on the Cochrane approach, that is, adequate, uncertain, or clearly inadequate. Quality assessment was performed using the Jadad scale.<sup>14</sup> Authors of the primary studies were contacted, when possible, if information was missing or unclear. There were no disagreements between the reviewers in relation to any of the data extracted.

### Study Groups and Outcome Parameters

Studies reporting categorical adverse outcomes were grouped based on the following definitions: “any wound infection”—Centers for Disease Control and Prevention surgical-site infection criteria or no criteria provided; “deep wound infection”—Centers for Disease Control and Prevention deep/organ space surgical-site infection criteria or abdominal abscess at the site of surgery; “any infection”—specifically reported in results table (not amalgamated from individual complications, thereby avoiding double counting); “impaired wound healing” or “anastomotic leak” or “postoperative hemorrhage” or “malignancy recurrence”—specifically reported in results table. Studies were also grouped if the following continuous outcomes were measured perioperatively: blood glucose (mg/dl), CRP (mg/l), intraoperative blood loss (ml), and hospital length of stay measured in days.

The impact of glucocorticoid dose was assessed using dexamethasone as the reference drug; each outcome group was stratified according to dexamethasone dose equivalents in the first 24h perioperatively into low (less than 8 mg), medium (8 to 16 mg), and high (more than 16 mg), using an online steroid equivalence converter (<http://www.medcalc.com>). These thresholds were selected to correspond to antiemetic doses,<sup>15</sup> doses to control swelling in maxillofacial surgery,<sup>6</sup> and doses aggressively targeting the systemic inflammatory response.<sup>2</sup> Studies assessing more than one dose of glucocorticoid against a single control group were

considered as a separate study for each dose. Studies reporting outcomes in diabetic and nondiabetic subgroups were also considered as separate studies where relevant.

### Statistical Analysis

Statistical analyses were conducted using MetaXL version 3.1 (EpiGear International Pty Ltd, Australia). The presence and extent of heterogeneity between studies were assessed with Cochran  $Q$  and  $I^2$  statistics. Pooled categorical outcomes incorporating studies with sparse event data were meta-analyzed using Peto odds ratio (OR) method with a 0.5 continuity correction where zero events occurred in both groups. Sensitivity analyses were subsequently performed using high-quality trials only (Jadad scale score, 4 to 5). Continuous outcomes were analyzed with the quality effects model incorporating the Jadad scale and expressed as weighted mean difference. Where median (range) data only were available, conversion to mean (SD) followed established guidance.<sup>16</sup>

For the primary outcome of blood glucose, the time point within each relevant study from the intraoperative or early postoperative (up to 12 h after surgery) periods with the highest mean values across both arms was used to compare peak perioperative glucose concentrations in the presence or absence of glucocorticoid. A similar approach was employed to assess peak perioperative CRP concentrations, using the time point within 3 days of surgery with the highest mean values across both arms. A sensitivity analysis with respect to blood glucose was conducted for trials with explicit exclusion criteria for diabetes. For the primary outcome of any wound infection, sensitivity analyses across all trials were performed using the Mantel–Haenszel, inverse variance, and quality effects models. Further sensitivity analyses were conducted for trials employing wound infection surveillance against Centers for Disease Control and Prevention criteria and for trials using dexamethasone as the glucocorticoid intervention.

Mixed meta-regression (methods of moment) was used to assess any potential interaction between dexamethasone dose (or equivalent) in the first 24 h and the risk of any wound infection and any interaction between the initial dexamethasone dose (or equivalent) and peak perioperative blood glucose concentrations (Comprehensive Meta-analysis version 2.2.034; Biostat, USA).  $P < 0.05$  was used to denote statistical significance as this corresponded to an acceptable risk of false-positive results (type 1 error) for the primary outcomes within our specific meta-analysis design.<sup>17</sup>

## Results

### Characteristics of the Included Studies

The Preferred Reporting Items for Systematic Reviews and Meta-analyses flow diagram outlining the study selection process is detailed in figure 1. Fifty-six randomized controlled trials employing perioperative glucocorticoids including 5,607 patients from 18 countries were identified and subject

to meta-analysis (median sample size, 58; interquartile range, 36 to 106).<sup>18–73</sup> The median Jadad score was 4 (interquartile range, 3 to 5); 31 trials were ascribed a score of 4 or 5. The characteristics of the studies and their interventions are summarized in table 1. The number of studies and patients in each outcome group are summarized in table 2. Twenty-nine studies used dexamethasone, 24 used methylprednisolone, 2 used hydrocortisone, and 1 used betamethasone. The drug was administered intravenously in all trials, predominantly as a single preoperative or early intraoperative dose. Repeated doses were given in two studies using dexamethasone, two studies using methylprednisolone, and two studies using hydrocortisone. Eighteen trials reported on any wound infection as an outcome (table 3). Three used Centers for Disease Control and Prevention criteria, and three used clinical signs together with a positive culture and/or antibiotic therapy for diagnosis of wound infection. In only one trial was wound infection the primary outcome, and in one trial, wound infection was a component of a composite primary outcome. In 12 trials, the criteria for reaching a diagnosis of wound infection were either unclear or not stated.

### Outcomes

There was no difference in the incidence of any wound infection in patients randomized to perioperative glucocorticoid (OR, 0.8; 95% CI, 0.6 to 1.2;  $P = 0.80$ ; fig. 2A). This was unchanged after excluding low-quality trials (OR, 1.0; CI, 0.7 to 1.4) or including only trials that employed surveillance for wound infection against Centers for Disease Control and Prevention criteria (OR, 1.1; CI, 0.8 to 1.6; fig. 2B) or trials using dexamethasone (OR, 0.9; CI, 0.6 to 1.3). Across all trials, findings were unchanged with the Mantel–Haenszel model (OR, 0.9; CI, 0.6 to 1.2), the inverse variance model (OR, 0.9; CI, 0.7 to 1.3), and the quality effects model (OR, 0.9; CI, 0.7 to 1.3). Patients randomized to perioperative glucocorticoid had similar rates of deep wound infection (OR, 1.2; CI, 0.8 to 1.8; fig. 2C), impaired wound healing (OR, 1.0; CI, 0.5 to 2.1), any infection (OR, 0.9; CI, 0.6 to 1.3), anastomotic leak (OR, 1.0; CI, 0.5 to 2.2), and postoperative hemorrhage (OR, 1.4; CI, 0.7 to 2.7). These findings were unchanged restricting analyses to high-quality trials only or those using Centers for Disease Control and Prevention criteria (fig. 2D).

The highest glucose value measured at a specific time intraoperatively or within the first 12 h after surgery was greater in patients receiving glucocorticoids (weighted mean difference, 20.0 mg/dl; CI, 11.4 to 28.6;  $P < 0.001$ ; fig. 3A). When studies excluding diabetic patients only were analyzed, a smaller but nonetheless statistically significant rise in blood glucose was observed (weighted mean difference, 14.0 mg/dl; CI, 2.0 to 25.9;  $P = 0.02$ ). Hyperglycemia in studies with no diabetic exclusion criteria appeared more marked (weighted mean difference, 30.1 mg/dl; CI, 22.1 to 38.0;  $P < 0.001$ ). The highest CRP value measured at a specific time within the first 3 postoperative days was lower in patients receiving

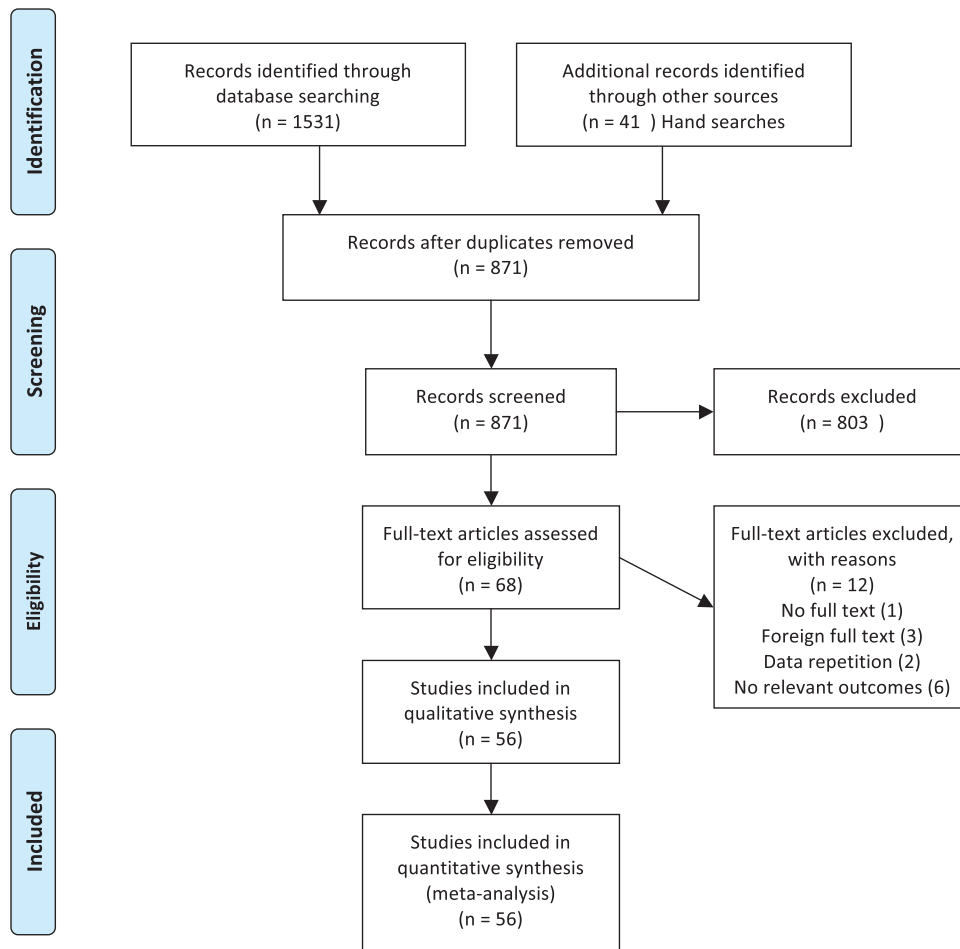

**Fig. 1.** Flowchart of systematic database search and trial identification.

glucocorticoids (weighted mean difference,  $-22.1$  mg/l; CI,  $-31.7$  to  $-12.5$ ;  $P < 0.001$ ; fig. 3B). The length of hospital stay was no different with perioperative glucocorticoids (weighted mean difference,  $-0.3$  days; CI,  $-1.4$  to  $0.8$ ;  $P = 0.65$ ; fig. 3C). Intraoperative bleeding was unchanged after glucocorticoid administration (weighted mean difference,  $-6.4$  ml; CI,  $-28.2$  to  $15.4$ ;  $P = 0.58$ ). Only a single study reported on malignancy recurrence, using follow-up data from a randomized trial of perioperative dexamethasone assessing the primary outcomes of peritoneal cytokines and fatigue.<sup>49</sup> Malignancy recurrence was, therefore, not subjected to meta-analysis. Stratification according to low-, medium-, or high-dose dexamethasone equivalents did not change the statistical significance of any of the categorical or continuous outcomes.

In a meta-regression analysis, there was no association between glucocorticoid dose and the subsequent risk of any wound infection (slope of regression line,  $-0.004$ ; 95% CI,  $-0.001$  to  $0.003$ ;  $P = 0.30$ ; fig. 4A). There was also no association between the doses of dexamethasone and the difference in maximum glucose concentrations between the included studies (slope of regression line,  $0.02$ ; 95% CI,  $-0.01$  to  $0.05$ ;  $P = 0.21$ ; fig. 4B).

### Bias

Funnel and Doi plot analyses suggest that less precise studies report greater reductions in any wound infection incidence after perioperative glucocorticoid administration (fig. 5, A and B). Blood glucose trials did not exhibit significant bias (fig. 5, C and D).

### Discussion

The most important finding of this meta-analysis is that perioperative glucocorticoid administration does not result in an increased incidence of any wound infection, deep wound infection, anastomotic leak, impaired wound healing, or bleeding in patients undergoing noncardiac surgery. Glucocorticoids did not influence the length of stay but were associated with a clinically unimportant increase in blood glucose concentrations and a decrease in CRP concentrations. Although these findings appear to affirm the safety of short-term administration of glucocorticoids, the literature regarding safety outcomes is not particularly robust. Given the expanding use of these agents and the implications of harm for a large number of patients, this requires further discussion.



Table 1. Study Characteristics

| Author, Country, Journal, Year                                                       | Surgery Type (n)                       | Glucocorticoid (Dexamethasone Equivalent Dose)                                                   | Primary Outcome(s)                                     | Diabetics Excluded? (Criteria)    |
|--------------------------------------------------------------------------------------|----------------------------------------|--------------------------------------------------------------------------------------------------|--------------------------------------------------------|-----------------------------------|
| Abdelmalak <i>et al.</i> , <sup>18</sup> USA, Br J Anaesth, 2013 (DeLiT trial)       | Major noncardiac (n = 381)             | Dexamethasone, 14 mg more than 3 d                                                               | Composite of 15 major complications and 30-d mortality | No                                |
| Abdelmalak <i>et al.</i> , <sup>74</sup> USA, Anesth Analg, 2013 (DeLiT trial)       | Major noncardiac (n = 185)             | Dexamethasone, 8 mg                                                                              | Blood glucose                                          | Nondiabetics (a)<br>Diabetics (b) |
| Aldrighetti <i>et al.</i> , <sup>19</sup> Italy, Liver Transpl, 2006                 | Liver resection (n = 76)               | Methylprednisolone, 500 mg (dexamethasone, 100 mg)                                               | Liver function tests/inflammatory mediators            | No                                |
| Backes <i>et al.</i> , <sup>20</sup> USA, J Arthroplasty, 2013                       | Total joint arthroplasty (n = 120)     | Dexamethasone, 10 mg                                                                             | PONV/pain                                              | Yes (Hba1c > 7.5%)                |
| Bianchin <i>et al.</i> , <sup>21</sup> Italy, Minerva Anesthesiol, 2007              | Laparoscopic cholecystectomy (n = 80)  | Dexamethasone, 8 mg                                                                              | PONV                                                   | Yes (uncontrolled)                |
| Bigler <i>et al.</i> , <sup>22</sup> Denmark, J Thorac Cardiovasc Surg, 1995         | Pulmonary resection (n = 36)           | Methylprednisolone, 25 mg/kg (dexamethasone, 5 mg/kg)                                            | Pulmonary function/pain                                | Yes                               |
| Bisgaard <i>et al.</i> , <sup>23</sup> Denmark, Ann Surg, 2003                       | Laparoscopic cholecystectomy (n = 80)  | Dexamethasone, 8 mg                                                                              | Fatigue/pain                                           | Yes (signs of endocrine disease)  |
| Coloma <i>et al.</i> , <sup>24</sup> USA, Anesth Analg, 2001                         | Anorectal (n = 80)                     | Dexamethasone, 4 mg                                                                              | Time to home readiness                                 | No                                |
| Cowie <i>et al.</i> , <sup>25</sup> Australia, Anaesth Intensive Care, 2010          | Laparoscopic cholecystectomy (n = 14)  | Dexamethasone, 8 mg                                                                              | Plasma cortisol                                        | Yes                               |
| Doksørd <i>et al.</i> , <sup>26</sup> Norway, Acta Anaesthesiol Scan, 2012           | Thyroid (n = 120)                      | Dexamethasone, 0.15 mg/kg (a) and 0.3 mg/kg (b)                                                  | Pain                                                   | No                                |
| Feo <i>et al.</i> , <sup>59</sup> Italy, Br J Surg, 2006                             | Laparoscopic cholecystectomy (n = 101) | Dexamethasone, 8 mg                                                                              | PONV                                                   | Yes (endocrine disorder)          |
| Fukami <i>et al.</i> , <sup>60</sup> Japan, J Hepatobiliary Pancreat Surg, 2009      | Laparoscopic cholecystectomy (n = 80)  | Dexamethasone, 8 mg                                                                              | PONV                                                   | Yes (Hba1c > 8.5%)                |
| Hayashi <i>et al.</i> , <sup>27</sup> Japan, Ann Surg, 2011                          | Liver resection (n = 210)              | Hydrocortisone, 1,100 mg more than 3 d (dexamethasone, 44 mg)                                    | Serum bilirubin                                        | Yes (unstable diabetes)           |
| Hyrkäs <i>et al.</i> , <sup>61</sup> Finland, Scand J Plast Reconstr Hand Surg, 1994 | Dental extraction (n = 242)            | Methylprednisolone, 40 mg (dexamethasone, 8 mg)                                                  | Wound healing                                          | No                                |
| Jules-Elysee <i>et al.</i> , <sup>73</sup> USA, J Bone Joint Surg Am, 2012           | Bilateral knee arthroplasty (n = 34)   | Hydrocortisone, 300 mg more than 16 h (dexamethasone, 12 mg)                                     | Interleukin-6                                          | No                                |
| Kara <i>et al.</i> , <sup>72</sup> Turkey, Plast Reconstr Surg, 1999                 | Rhinoplasty (n = 55)                   | Dexamethasone, 10 mg                                                                             | Unclear                                                | Yes                               |
| Karaman <i>et al.</i> , <sup>28</sup> Turkey, Am J Surgery, 2013                     | Laparoscopic cholecystectomy (n = 80)  | Dexamethasone, 8 mg                                                                              | Unclear                                                | Yes                               |
| Kardash <i>et al.</i> , <sup>29</sup> USA, Anesth Analg, 2008                        | Total hip arthroplasty (n = 50)        | Dexamethasone, 40 mg                                                                             | Pain                                                   | Yes                               |
| Kargi <i>et al.</i> , <sup>62</sup> Turkey, Ann Plast Surg, 2003                     | Rhinoplasty (n = 60)                   | Dexamethasone, 8 mg (plus repeat doses)                                                          | Unclear                                                | Yes                               |
| Kirdak <i>et al.</i> , <sup>30</sup> Turkey, The American Surgeon, 2008              | Colorectal (n = 30)                    | Dexamethasone, 8 mg                                                                              | Unclear                                                | No                                |
| Koc <i>et al.</i> , <sup>63</sup> Turkey, Am J Rhinol Allergy, 2011                  | Rhinoplasty (n = 40)                   | Methylprednisolone, 1 mg/kg (a) and 3 mg/kg (b) (dexamethasone, 0.2 mg/kg [a] and 0.6 mg/kg [b]) | Unclear                                                | Yes                               |
| Koh <i>et al.</i> , <sup>31</sup> Korea, Clin Orthop Relat Res, 2013                 | Total knee arthroplasty (n = 269)      | Dexamethasone, 10 mg                                                                             | PONV                                                   | No                                |
| Komori <i>et al.</i> , <sup>32</sup> Japan, Int Angiol, 1999                         | Aortic aneurysm repair (n = 20)        | Methylprednisolone, 1 g (dexamethasone, 200 mg)                                                  | Interleukin-6                                          | No                                |
| Kurz <i>et al.</i> , <sup>33</sup> USA, Br J Anaesth, 2015                           | Colorectal (n = 555)                   | Dexamethasone, 4 mg                                                                              | Surgical-site infection                                | No                                |
| Lee <i>et al.</i> , <sup>34</sup> Korea, Surg Endosc, 2014                           | Endoscopic gastric (n = 36)            | Dexamethasone, 0.15 mg/kg                                                                        | Pain                                                   | Yes (severe diabetes)             |
| Lunn <i>et al.</i> , <sup>36</sup> Denmark, BJA, 2013                                | Total hip arthroplasty (n = 48)        | Methylprednisolone, 125 mg (dexamethasone, 25 mg)                                                | Time to discharge readiness                            | Yes (diabetic neuropathy)         |
| Lunn <i>et al.</i> , <sup>36</sup> Denmark, BJA, 2011                                | Total knee arthroplasty (n = 48)       | Methylprednisolone, 125 mg (dexamethasone, 25 mg)                                                | Pain                                                   | Yes (diabetic neuropathy)         |

(Continued)

Table 1. (Continued)

| Author, Country, Journal, Year                                                        | Surgery Type (n)                       | Glucocorticoid (Dexamethasone Equivalent Dose)                          | Primary Outcome(s)              | Diabetics Excluded? (Criteria)   |
|---------------------------------------------------------------------------------------|----------------------------------------|-------------------------------------------------------------------------|---------------------------------|----------------------------------|
| Marion <i>et al.</i> , <sup>64</sup> USA, Neurosurgery, 1988                          | Microvascular decompression (n = 222)  | Methylprednisolone, 40 mg (dexamethasone, 8 mg) plus repeat doses       | Unclear                         | No                               |
| Mathiesen <i>et al.</i> , <sup>65</sup> Denmark, Acta Anaesthesiol Scand, 2011        | Tonsillectomy (n = 131)                | Dexamethasone, 8 mg                                                     | Pain                            | No                               |
| Muratore <i>et al.</i> , <sup>37</sup> Italy, Br J Surg, 2003                         | Liver resection (n = 53)               | Methylprednisolone, 30 mg/kg (dexamethasone, 6 mg/kg)                   | Unclear                         | No                               |
| Murphy <i>et al.</i> , <sup>38</sup> USA, Anesth Analg, 2014                          | Hysterectomy (n = 200)                 | Dexamethasone, 4 mg (a, c) and 8 mg (b, d)                              | Blood glucose                   | Yes                              |
| Nagelschmidt <i>et al.</i> , <sup>39</sup> Germany, Eur J Surg, 1999                  | Abdominal (n = 20)                     | Methylprednisolone, 30 mg/kg (dexamethasone, 6 mg/kg)                   | Unclear                         | Yes                              |
| Nazar <i>et al.</i> , <sup>40</sup> Chile, Eur J Anaesthesiol, 2009                   | Gastric bypass (n = 30)                | Dexamethasone, 8 mg                                                     | Blood glucose                   | No                               |
| Nielsen <i>et al.</i> , <sup>66</sup> Denmark, Pain, 2015                             | Lumbar disc repair (n = 160)           | Dexamethasone, 16 mg                                                    | Pain                            | No                               |
| Pulitanò <i>et al.</i> , <sup>41</sup> Italy, HPB, 2007                               | Liver resection (n = 43)               | Methylprednisolone, 500 mg (dexamethasone, 100 mg)                      | ALT                             | No                               |
| Rahimzadeh <i>et al.</i> , <sup>42</sup> Iran, J Clin Diagn Res, 2014                 | Hip fracture (n = 82)                  | Methylprednisolone, 125 mg (dexamethasone, 25 mg)                       | Pain                            | Yes                              |
| Reikerås <i>et al.</i> , <sup>67</sup> Norway, Eur J Trauma Emerg Surg, 2007          | Lumbar osteotomy (n = 20)              | Methylprednisolone, 10 mg/kg (dexamethasone, 2 mg/kg)                   | Unclear                         | No                               |
| Rendina <i>et al.</i> , <sup>68</sup> Italy, J Thorac Cardiovasc Surg, 1992           | Lung resection (n = 20)                | Methylprednisolone, 10 mg/kg (dexamethasone, 2 mg/kg) plus repeat doses | Bronchial healing               | No                               |
| Sánchez-Rodríguez <i>et al.</i> , <sup>69</sup> Mexico, World J Surg, 2010            | Laparoscopic cholecystectomy (n = 210) | Dexamethasone, 8 mg                                                     | PONV                            | Yes (HbA1c > 8%)                 |
| Sato <i>et al.</i> , <sup>43</sup> Japan, Ann Surg, 2002                              | Esophagectomy (n = 66)                 | Methylprednisolone, 10 mg/kg (dexamethasone, 2 mg/kg)                   | Organ system failure            | Yes (insulin therapy)            |
| Schietroma <i>et al.</i> , <sup>44</sup> Italy, JAMA Otolaryngol Head Neck Surg, 2013 | Thyroid (n = 328)                      | Dexamethasone, 8 mg                                                     | Recurrent laryngeal nerve palsy | No                               |
| Schietroma <i>et al.</i> , <sup>45</sup> Italy, Updates Surg, 2010                    | Nissen fundoplication (n = 82)         | Dexamethasone, 8 mg                                                     | Pain/fatigue                    | Yes (signs of endocrine disease) |
| Schmidt <i>et al.</i> , <sup>46</sup> Germany, J Hepatobiliary Pancreat Surg, 2007    | Liver resection (n = 20)               | Methylprednisolone, 30 mg/kg (dexamethasone, 6 mg/kg)                   | Interleukin-6                   | Yes (endocrine disorder)         |
| Schulze <i>et al.</i> , <sup>47</sup> Denmark, Arch Surg, 1997                        | Colorectal (n = 24)                    | Methylprednisolone, 30 mg/kg (dexamethasone, 6 mg/kg)                   | Unclear                         | Yes                              |
| Simsa <i>et al.</i> , <sup>48</sup> Sweden, Eur J Pain, 2013                          | Inguinal hernia repair (n = 398)       | Betamethasone, 12 mg (dexamethasone, 14.4 mg)                           | Pain                            | Yes                              |
| Singh <i>et al.</i> , <sup>49</sup> New Zealand, Br J Anaesth, 2014                   | Colorectal (n = 60)                    | Dexamethasone, 8 mg                                                     | Peritoneal cytokines/fatigue    | No                               |
| Snäll <i>et al.</i> , <sup>50</sup> Finland, Br J Oral Maxillofac Surg, 2013          | Mandible fracture (n = 41)             | Dexamethasone, 30 mg/16 h                                               | Impaired wound healing          | No                               |
| Takeda <i>et al.</i> , <sup>51</sup> Japan, Eur J Surg, 1997                          | Esophagectomy (n = 30)                 | Methylprednisolone, 30 mg/kg (dexamethasone, 6 mg/kg)                   | Intensive care unit stay        | Yes (metabolic disease)          |
| Thangaswamy <i>et al.</i> , <sup>70</sup> India, J Anesth, 2010                       | Laparoscopic hysterectomy (n = 55)     | Dexamethasone, 4 mg (a) and 8 mg (b)                                    | Pain                            | Yes                              |
| Turner <i>et al.</i> , <sup>52</sup> United Kingdom, Br J Surg, 2008                  | Aortic aneurysm repair (n = 20)        | Methylprednisolone, 10 mg/kg (dexamethasone, 2 mg/kg)                   | Renal function                  | Yes                              |
| Turner <i>et al.</i> , <sup>53</sup> United Kingdom, Anaesthesia, 2006                | Liver transplantation (n = 34)         | Methylprednisolone, 10 mg/kg (dexamethasone, 2 mg/kg)                   | Renal function                  | No                               |
| Vignali <i>et al.</i> , <sup>54</sup> Italy, Dis Colon Rectum, 2009                   | Colorectal (n = 52)                    | Methylprednisolone, 30 mg/kg (dexamethasone, 6 mg/kg)                   | Respiratory function            | No                               |
| Worni <i>et al.</i> , <sup>71</sup> Switzerland, Ann Surg, 2008                       | Thyroidectomy (n = 72)                 | Dexamethasone, 8 mg                                                     | PONV                            | Yes (insulin therapy)            |
| Yamashita <i>et al.</i> , <sup>55</sup> Japan, Arch Surg, 2001                        | Liver resection (n = 33)               | Methylprednisolone, 500 mg (dexamethasone, 100 mg)                      | Interleukin-6                   | No                               |
| Yano <i>et al.</i> , <sup>56</sup> Japan, Hepatogastroenterology, 2005                | Esophagectomy (n = 40)                 | Methylprednisolone, 500 mg (dexamethasone, 100 mg)                      | Unclear                         | No                               |
| Zargar-Shoshtari <i>et al.</i> , <sup>57</sup> New Zealand, Br J Surg, 2009           | Colorectal (n = 60)                    | Dexamethasone, 8 mg                                                     | Peritoneal cytokines/fatigue    | No                               |
| Zotti <i>et al.</i> , <sup>58</sup> Italy, Ital J Surg Sci, 1998                      | Hepatobiliary/vascular (n = 82)        | Methylprednisolone, 30 mg/kg (dexamethasone, 6 mg/kg)                   | Pulmonary complication          | Yes                              |

DeLiT = dexamethasone, light anaesthesia, and tight glucose control; HbA1c = glycated hemoglobin; PONV = postoperative nausea and vomiting.

**Table 2.** Summary of Studies Grouped and Analyzed for Each Outcome Category

| Adverse Outcome                                                              | Eligible Studies | Total Patients | Median Sample Size (IQR) | No. of Events (%) | $I_2$ % | Trials with Sparse Event Data? | Method (s) Used |
|------------------------------------------------------------------------------|------------------|----------------|--------------------------|-------------------|---------|--------------------------------|-----------------|
| Any wound infection <sup>18,19,23,24,26,27,30,33,46,55,57,60,69–71,73</sup>  | 18*              | 2,138          | 77 (36–80)               | 177 (8.3)         | 0       | Yes                            | Peto/MH/IV/QE   |
| Blood glucose <sup>25,26,38,40,73,74</sup>                                   | 11*              | 685            | 65 (42–74)               | n/a               | 60      | n/a                            | QE              |
| Deep wound infection <sup>18,27,30,33,55</sup>                               | 5                | 1,196          | 200 (33–381)             | 90 (7.5)          | 22      | Yes                            | Peto            |
| Any infection <sup>19,33,41,43,54,56,61</sup>                                | 8*               | 992            | 59 (50–83)               | 136 (13.7)        | 41      | Yes                            | Peto            |
| Impaired wound healing <sup>22,26,27,38,47,50,68</sup>                       | 11*              | 742            | 65 (39–73)               | 32 (4.3)          | 0       | Yes                            | Peto            |
| Anastomotic leak <sup>18,43,54,56,57</sup>                                   | 6*               | 599            | 50 (30–65)               | 26 (4.3)          | 0       | Yes                            | Peto            |
| Intraoperative blood loss <sup>19,62,63,65,66,72,73</sup>                    | 11*              | 513            | 25 (20–54)               | n/a               | 57      | n/a                            | QE              |
| Postoperative hemorrhage <sup>19,21,24,34,41,48,61,66</sup>                  | 8                | 1,098          | 77 (66–175)              | 35 (3.2)          | 6       | Yes                            | Peto            |
| Length of stay <sup>19–21,27,30,33–35,37,39,41,46,51,52,54,55,57,59,73</sup> | 20*              | 1,633          | 50 (32–74)               | n/a               | 89      | n/a                            | QE              |
| CRP <sup>18,28–30,32,35,42,46,55,57,67</sup>                                 | 11               | 781            | 40 (24–55)               | n/a               | 96      | n/a                            | QE              |

\*Studies with more than one drug dose compared to placebo or segregation of diabetic and nondiabetic patients were considered as separate studies.

CRP = C-reactive protein;  $I^2$  = I-squared statistic for heterogeneity; IQR = interquartile range; IV = inverse variance; MH = Mantel-Haenszel; n/a = not applicable; QE = quality effects.

**Table 3.** Characteristics of Studies Reporting on Any Wound Infection

| Author, Year                                         | Criteria for Any Wound Infection                                              | Surveillance Period             | Glucocorticoid Event Rate | Control Event Rate |
|------------------------------------------------------|-------------------------------------------------------------------------------|---------------------------------|---------------------------|--------------------|
| Abdelmalak <i>et al.</i> , <sup>18</sup> 2013        | CDC for deep/organ space SSI*                                                 | Duration of hospitalization     | 21/193                    | 14/188             |
| Aldrichetti <i>et al.</i> , <sup>19</sup> 2006       | Positive culture in the presence of clinical evidence of infection            | Unclear                         | 0/36                      | 2/37               |
| Bisgaard <i>et al.</i> , <sup>23</sup> 2003          | Unclear                                                                       | 30 d                            | 1/40                      | 1/40               |
| Coloma <i>et al.</i> , <sup>24</sup> 2001            | Unclear                                                                       | 10 d                            | 3/40                      | 5/40               |
| Doksrod <i>et al.</i> , <sup>26</sup> 2012           | Unclear                                                                       | 30 d                            | 0/40                      | 3/40               |
| Doksrod <i>et al.</i> , <sup>26</sup> 2012           | Unclear                                                                       | 30 d                            | 2/40                      | 3/40               |
| Fukami <i>et al.</i> , <sup>60</sup> 2009            | Unclear                                                                       | 1 undefined postoperative visit | 0/40                      | 0/40               |
| Hayashi <i>et al.</i> , <sup>27</sup> 2011           | Positive culture in association with clinical signs and symptoms of infection | Unclear                         | 10/102                    | 12/98              |
| Jules-Elysee <i>et al.</i> , <sup>73</sup> 2012      | Unclear                                                                       | Clinic at 3/6 mo                | 0/17                      | 0/17               |
| Kirdak <i>et al.</i> , <sup>30</sup> 2008            | CDC for superficial/organ cavity SSI                                          | 30 d                            | 0/14                      | 3/13               |
| Kurz <i>et al.</i> , <sup>33</sup> 2015              | CDC for superficial/deep/peritoneal SSI†                                      | 30 d                            | 45/283                    | 42/272             |
| Sánchez-Rodríguez <i>et al.</i> , <sup>69</sup> 2010 | Unclear                                                                       | 30 d                            | 0/105                     | 0/105              |
| Schmidt <i>et al.</i> , <sup>46</sup> 2007           | Unclear                                                                       | Unclear                         | 0/10                      | 1/10               |
| Thangaswamy <i>et al.</i> , <sup>70</sup> 2010       | Unclear                                                                       | 7 d                             | 0/18                      | 0/18               |
| Thangaswamy <i>et al.</i> , <sup>70</sup> 2010       | Unclear                                                                       | 7 d                             | 0/19                      | 0/18               |
| Worni <i>et al.</i> , <sup>71</sup> 2008             | Unclear                                                                       | 30 d                            | 0/37                      | 0/35               |
| Yamashita <i>et al.</i> , <sup>55</sup> 2001         | Unclear                                                                       | Unclear                         | 1/17                      | 2/16               |
| Zargar-Shoshtari <i>et al.</i> , <sup>57</sup> 2009  | Documented erythema or discharge requiring antibiotic treatment               | Unclear                         | 0/29                      | 6/31               |

\*Primary outcome was a composite of major complications including surgical-site infection. †Primary outcome was surgical-site infection.

CDC = Centers for Disease Control and Prevention; SSI = surgical-site infection.

Postoperative infections, particularly surgical-site infections, are important as they prolong hospital stay, increase costs, and have an impact on postoperative mortality that extends to at least to 30 days.<sup>75</sup> Among the glucocorticoids, dexamethasone is the most commonly administered agent in the perioperative period being a potent, cheap, and effective antiemetic,<sup>7,15</sup> with analgesic properties and the capacity to improve the quality of recovery, facilitating early hospital discharge.<sup>76–78</sup> While several meta-analyses and practice guidelines have asserted the apparent safety of perioperative

glucocorticoids in general and dexamethasone in particular in terms of infection risk,<sup>3,15,79</sup> the lack of definitions of adverse outcomes or use of postoperative surveillance has provoked much discussion.<sup>11,80</sup> Two small retrospective studies have produced conflicting results, with one suggesting that dexamethasone increases infection risk,<sup>81</sup> while a cohort study did not confirm these findings.<sup>82</sup> A large randomized controlled trial in cardiac surgery has reported a 4.9% absolute reduction in the risk of postoperative infection in patients receiving 1 mg/kg dexamethasone, principally

**A**

| ALL STUDIES       | Glucocorticoid |       | Placebo |       |
|-------------------|----------------|-------|---------|-------|
| Study name        | Events         | Total | Events  | Total |
| Abdelmalak        | 21             | 193   | 14      | 188   |
| Aldrighetti       | 0              | 36    | 2       | 37    |
| Bisgaard          | 1              | 40    | 1       | 40    |
| Coloma            | 3              | 40    | 5       | 40    |
| Doksrod(a)        | 0              | 40    | 3       | 40    |
| Doksrod(b)        | 2              | 40    | 3       | 40    |
| Hayashi           | 10             | 102   | 12      | 98    |
| Kirdak            | 0              | 14    | 3       | 13    |
| Kurz              | 45             | 283   | 42      | 272   |
| Schmidt           | 0              | 10    | 1       | 10    |
| Yamashita         | 1              | 17    | 2       | 16    |
| Zargar-Shostari   | 0              | 29    | 6       | 31    |
| Sanchez-Rodriguez | 0              | 105   | 0       | 105   |
| Thangaswamy(a)    | 0              | 18    | 0       | 18    |
| Thangaswamy(b)    | 0              | 19    | 0       | 18    |
| Worni             | 0              | 37    | 0       | 35    |
| Fukami            | 0              | 40    | 0       | 40    |
| Jules-Elysee      | 0              | 17    | 0       | 17    |
| Total             | 83             | 1080  | 94      | 1058  |

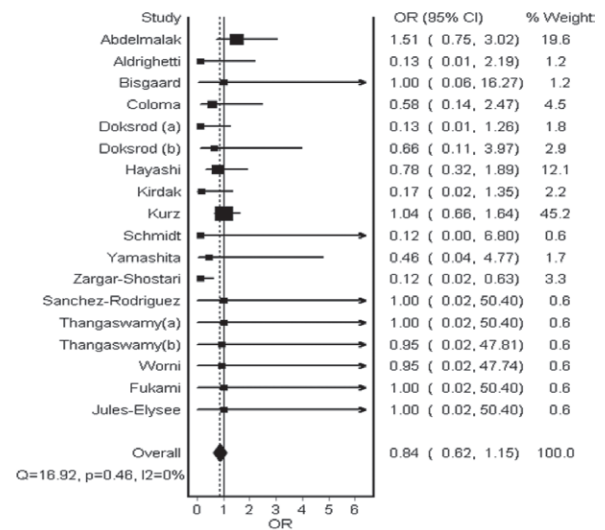**B**

| CDC STUDIES | Glucocorticoid |       | Placebo |       |
|-------------|----------------|-------|---------|-------|
| Study name  | Events         | Total | Events  | Total |
| Abdelmalak  | 21             | 193   | 14      | 188   |
| Kirdak      | 0              | 14    | 3       | 13    |
| Kurz        | 45             | 283   | 42      | 272   |
| Total       | 66             | 490   | 59      | 473   |

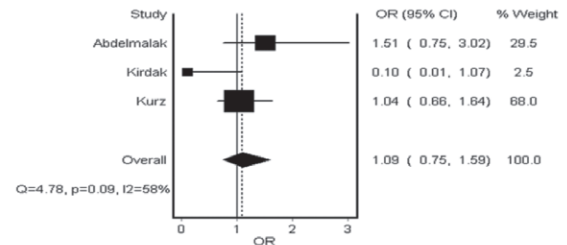**C**

| ALL STUDIES | Glucocorticoid |       | Placebo |       |
|-------------|----------------|-------|---------|-------|
| Study name  | Events         | Total | Events  | Total |
| Abdelmalak  | 21             | 193   | 14      | 188   |
| Hayashi     | 10             | 102   | 4       | 98    |
| Kirdak      | 0              | 14    | 1       | 13    |
| Kurz        | 17             | 283   | 21      | 272   |
| Yamashita   | 1              | 17    | 1       | 16    |
| Total       | 49             | 609   | 41      | 587   |

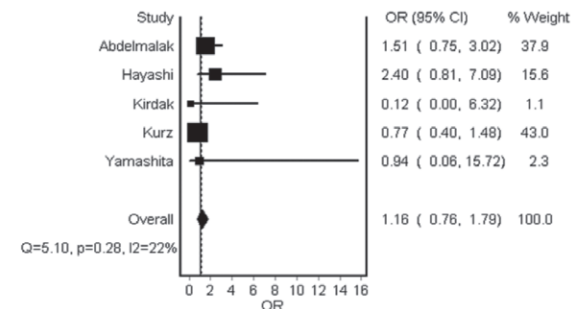**D**

| CDC STUDIES | Glucocorticoid |       | Placebo |       |
|-------------|----------------|-------|---------|-------|
| Study name  | Events         | Total | Events  | Total |
| Abdelmalak  | 21             | 193   | 14      | 188   |
| Kirdak      | 0              | 14    | 1       | 13    |
| Kurz        | 17             | 283   | 21      | 272   |
| Total       | 38             | 490   | 36      | 473   |

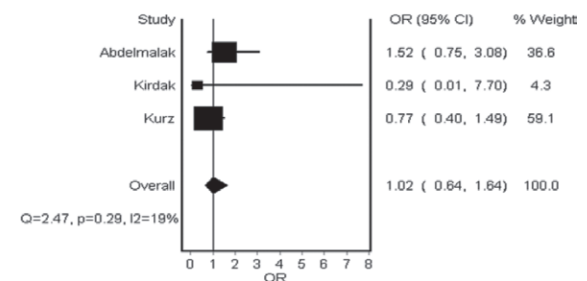

Favors glucocorticoid ← → Favors placebo

**Fig. 2.** The influence of perioperative glucocorticoid on the odds of any wound infection (A), any wound infection meeting Centers for Disease Control and Prevention criteria (CDC; B), deep wound infection (C), and deep wound infection meeting CDC criteria (D). OR = odds ratio.

related to the occurrence of pneumonia.<sup>1</sup> Our results do not suggest an effect of glucocorticoids on surgical-site infection, wound healing, and anastomotic leak nor a dose-related

trend. When our analyses were restricted to high-quality trials that used objective criteria and postoperative surveillance to day 30, the results did not change. Hence, these results



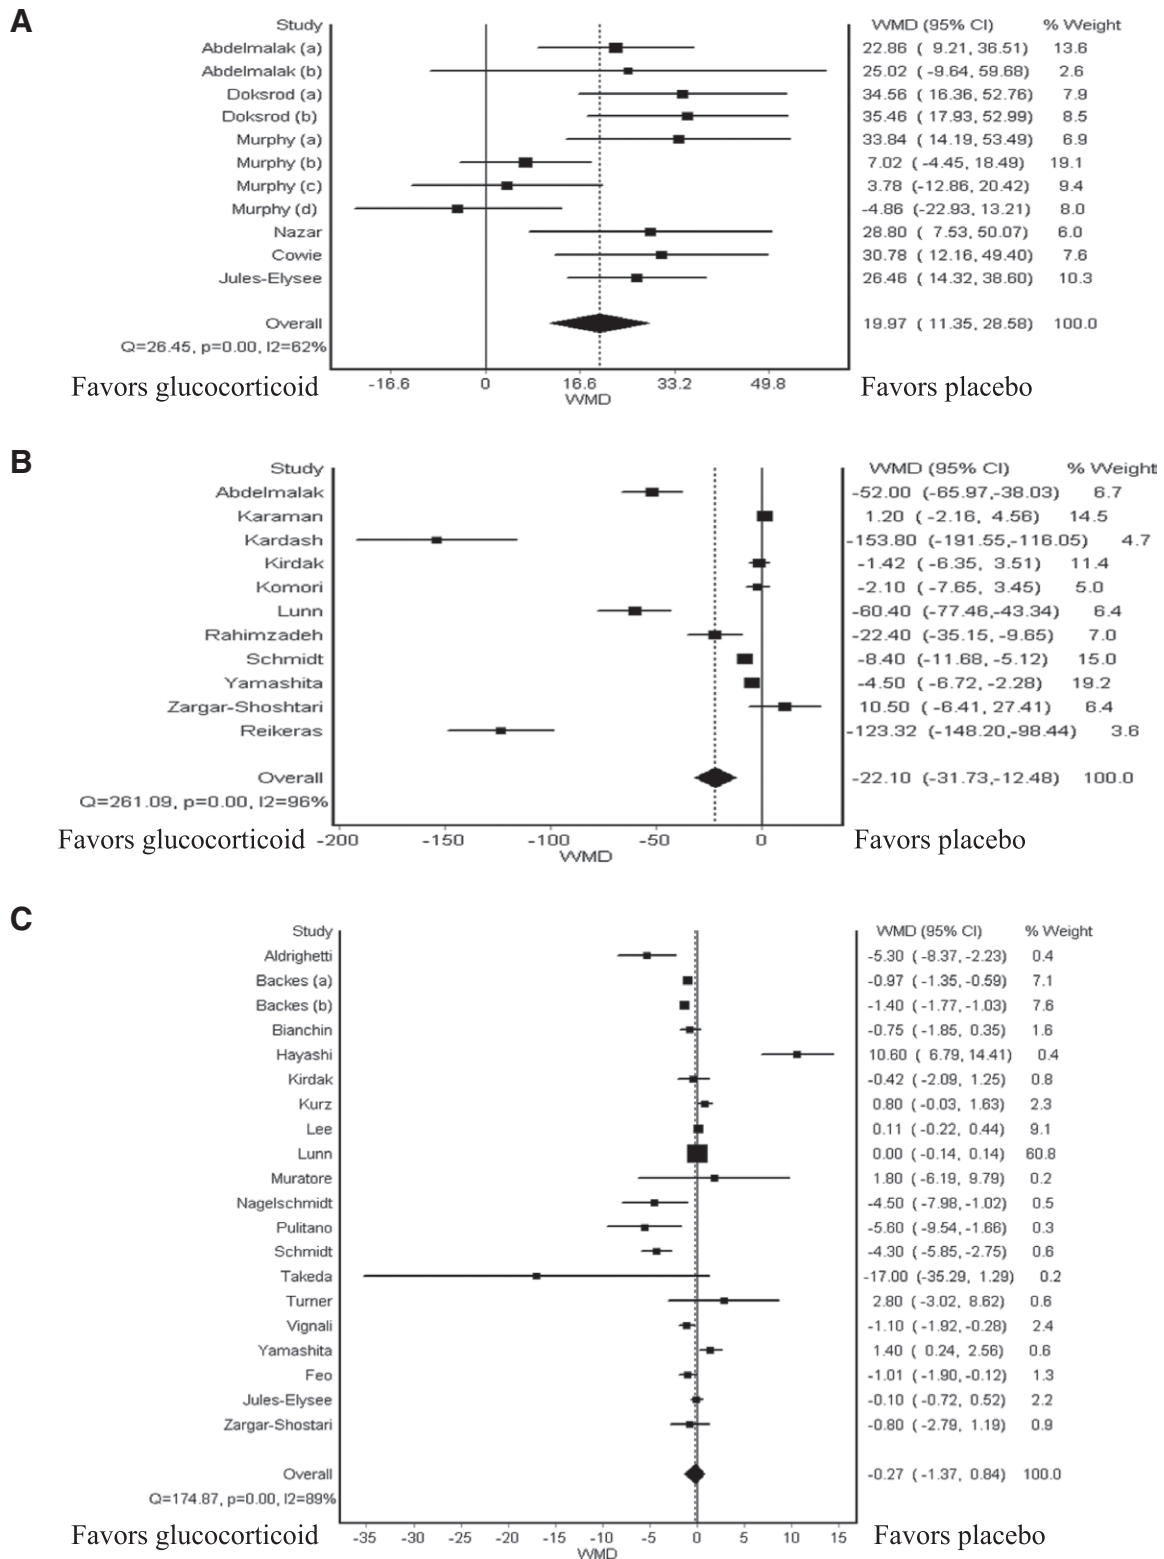

**Fig. 3.** The influence of perioperative glucocorticoid on peak perioperative blood glucose (mg/dl; A), peak perioperative C-reactive protein (mg/l; B), length of hospital stay (days; C). WMD = weighted mean difference.

are likely a robust finding. The Doi plot reveals that there is clear asymmetry, favoring the publication of small trials with lower rates of infection.

The hyperglycemic effect of perioperative glucocorticoids are real but small. Acute hyperglycemia may impair leukocyte functions<sup>83</sup> and wound healing,<sup>84</sup> these being worse

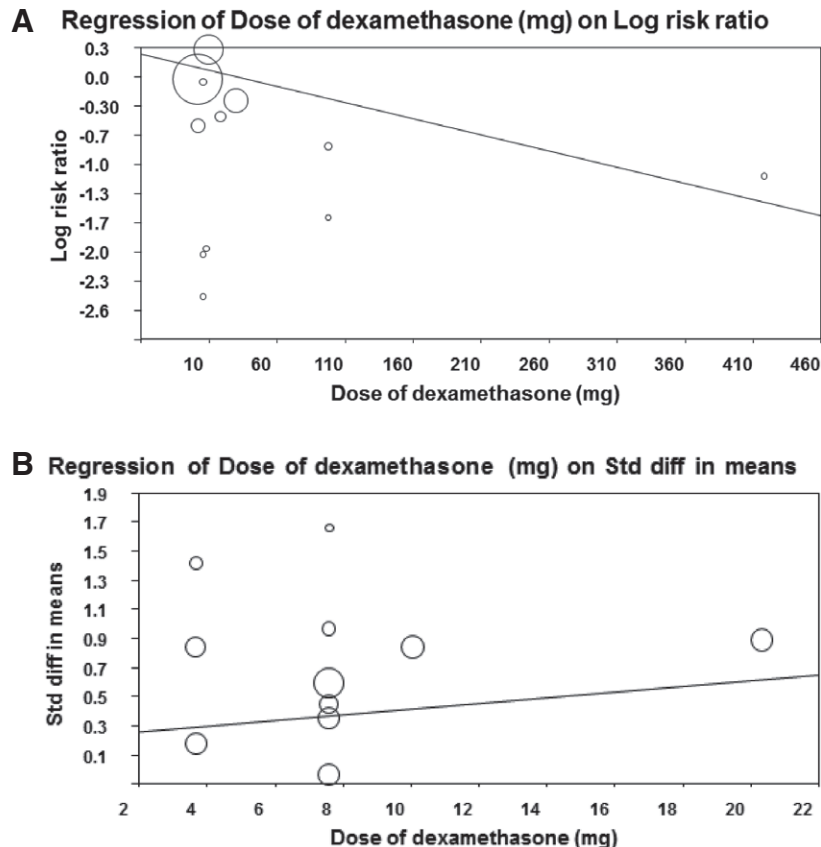

**Fig. 4.** Mixed meta-regression (methods of moment) to assess the interaction between dexamethasone dose equivalent and any wound infection (A;  $P = 0.30$ ) and peak perioperative blood glucose (mg/dl; B;  $P = 0.21$ ). The size of the markers is proportional to the size of the study. Std diff = standardized difference.

with surges of blood glucose rather than sustained hyperglycemia. While the clinical importance of perioperative hyperglycemia is as yet not fully evaluated, particularly in terms of causality, there is a growing body of observational data to support a strong relationship, especially in nondiabetic patients.<sup>85,86</sup> Studies have shown infectious and noninfectious complications to be directly related to the degree of hyperglycemia, with even a single elevation of blood glucose in the perioperative period being harmful.<sup>87,88</sup> Our results show that perioperative glucocorticoids increased blood glucose concentrations, but with the limited doses of dexamethasone used in the included trials in this meta-analysis (almost all less than or equal to 8 mg dexamethasone), the absolute difference in blood glucose (20.0 mg/dl) was modest and was only marginally less than that observed with a much larger dose in cardiac surgery patients.<sup>1</sup> We chose the maximal blood glucose concentration measured intraoperatively or postoperatively up to 12 h as this enabled the inclusion of the maximum number of trials. Whether this is the period in which a peak effect of glucocorticoid on blood glucose concentration is evident or not is unknown. Hyperglycemia after glucocorticoid was significant whether trials excluded diabetic patients or not, but the effect size appeared more marked in studies with no diabetic exclusion

criteria. This observation was strongly influenced by a single, well-conducted trial reporting no significant hyperglycemia with dexamethasone after gynecologic surgery in nondiabetics.<sup>38</sup> In contrast, a separate analysis of the data from one of the included randomized trials<sup>18</sup> has been published, and it suggests that the hyperglycemic effect is more marked in nondiabetic patients, even when controlling for insulin treatment in the diabetes group.<sup>74</sup> Overall, the importance of small blood glucose increases is unknown<sup>10</sup> and remains to be established in a large, properly conducted trial. Beyond infection and hyperglycemia, the effect of glucocorticoids on postoperative CRP concentrations is consistent with their well-documented antiinflammatory actions<sup>89</sup> and is not surprising.

Some previous meta-analyses in noncardiac surgery have reported reductions in specific or composite postoperative complications and length of stay after glucocorticoid administration.<sup>79,89</sup> The limitations of these studies include summation of individual complications and an absence of adjustment for study quality or glucocorticoid dose.<sup>90</sup> Other systematic reviews have reported no impact on adverse events but were based on searches restricted to specific outcomes such as pain and were not suitable for a safety assessment.<sup>3,78</sup> Overall assertions of safety have been criticized as

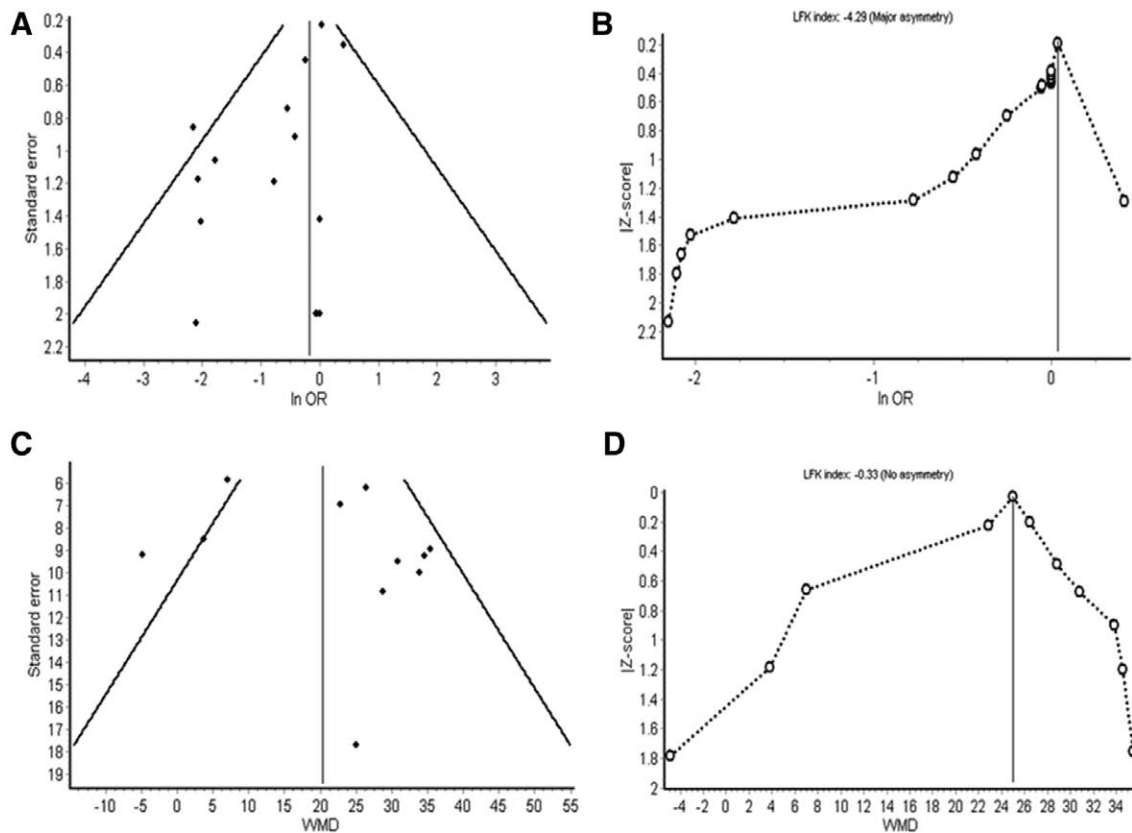

**Fig. 5.** Funnel and Doi plots for trials examining any wound infection (A, B) and perioperative blood glucose (C, D). LFK = Luis Furuya-Kanamari; OR = odds ratio; WMD = weighted mean difference.

few trials systematically defined or sought complications through postoperative surveillance. In this work, three recent high-quality trials with appropriate surveillance were included (and considered in isolation), and no impact on discrete complications was observed. Furthermore, trial quality and glucocorticoid dose were adequately adjusted for, lending further validity to the results.

Finally, we would like to acknowledge the limitations of this study, which are common to many meta-analyses<sup>91</sup> and which in our case are compounded by the poor quality of the definitions of the endpoints of interest. The qualitative outcomes (infection, anastomotic leak, and wound healing) lacked uniformity of approach and definition. In only one of the 18 trials reporting on infection rates was this a primary outcome, and in only six were any diagnostic definitions provided, a problem common to other fields.<sup>92</sup> The total number of patients included in this study was limited because we sought to specifically examine the effect of glucocorticoids in noncardiac surgery and nonobstetric patients as these patients represent the majority of patients undergoing general anesthesia globally every day. Combining the results of independent studies, with variable amounts of sampling error due to differing conditions, surgical populations, glucocorticoid type and dose, and sample size, is fraught with challenges.<sup>90</sup> The  $I^2$  statistic (which was low) for infective outcomes may be underpowered to detect heterogeneity

when the number of studies included in the meta-analysis is small ( $k < 20$ ) and/or the average sample size of the studies is less than 80 (both conditions pertain to this meta-analysis).<sup>93</sup> To address this, we employed both quality effects and inverse variance heterogeneity models, which provide more reliable estimates than the random effects model.<sup>94,95</sup> Smaller, lower quality, and less precise trials tended to report larger effect sizes after glucocorticoid, but their influence was removed or attenuated by sensitivity analysis or the quality effects model, respectively. Our meta-analysis provides data on any wound infection rates in 2,138 patients and on deep wound infection rates in 1,196 patients. Based on these data, with any and deep wound infection rates in the control groups of 8.9% and 7.0%, the detection of a small but clinically meaningful difference in infection rates of 2% between glucocorticoid and control groups at 90% power would require a trial with 3,543 patients in each arm.

In conclusion, our meta-analysis confirms many of the findings that have been asserted in previous meta-analyses and guideline documents. The administration of perioperative glucocorticoids to patients undergoing noncardiac and nonobstetric surgery appears to be safe in terms of postoperative infection risk, anastomotic leak, wound healing, and bleeding risk. They have a clear antiinflammatory effect without reducing the length of stay after surgery. Blood glucose concentrations do increase in the perioperative period

in patients receiving glucocorticoids, but the magnitude of changes is of questionable clinical importance especially since an increased risk of infection is not observed. An 8,800-patient trial of dexamethasone and surgical-site infection is in progress (Perioperative ADministration of Dexamethasone and Infection trial; ACTRN12614001226695). Pending those results, expected in 2019, available data suggest that single-dose perioperative dexamethasone does not provoke substantive complications. We can, therefore, be assured that the current literature does not raise any safety concerns that should rule out using low to moderate doses of glucocorticoids in the elective noncardiac surgical patient.

## Research Support

Royal Perth Hospital Department of Anaesthesia and Pain Medicine (Perth, Western Australia, Australia) funded academic time for database searches, data analysis, and manuscript preparation.

## Competing Interests

Drs. Ho and Corcoran are funded by WA Health and Raine Medical Research Foundation (Perth, Western Australia, Australia) through the Raine Clinical Research Fellowship. Drs. Chan and Ho are steering committee members for Perioperative ADministration of Dexamethasone and Infection (PADDI). Dr. Corcoran is the principal investigator for the PADDI trial. The other authors declare no competing interests.

## Correspondence

Address correspondence to Dr. Toner: Department of Anaesthesia and Pain Medicine, Royal Perth Hospital, Perth, Western Australia 6000, Australia. [toner@doctors.org.uk](mailto:toner@doctors.org.uk). This article may be accessed for personal use at no charge through the Journal Web site, [www.anesthesiology.org](http://www.anesthesiology.org).

## References

- Dieleman JM, Nierich AP, Rosseel PM, van der Maaten JM, Hofland J, Diephuis JC, Schepp RM, Boer C, Moons KG, van Herwerden LA, Tijssen JG, Numan SC, Kalkman CJ, van Dijk D; Dexamethasone for Cardiac Surgery (DECS) Study Group: Intraoperative high-dose dexamethasone for cardiac surgery: A randomized controlled trial. *JAMA* 2012; 308:1761–7
- Ho KM, Tan JA: Benefits and risks of corticosteroid prophylaxis in adult cardiac surgery: A dose-response meta-analysis. *Circulation* 2009; 119:1853–66
- Lunn TH, Kehlet H: Perioperative glucocorticoids in hip and knee surgery—benefit vs. harm? A review of randomized clinical trials. *Acta Anaesthesiol Scand* 2013; 57:823–34
- Bagchi D, Mandal MC, Das S, Sahoo T, Basu SR, Sarkar S: Efficacy of intravenous dexamethasone to reduce incidence of postoperative sore throat: A prospective randomized controlled trial. *J Anaesthesiol Clin Pharmacol* 2012; 28:477–80
- Thomas S, Beevi S: Dexamethasone reduces the severity of postoperative sore throat. *Can J Anaesth* 2007; 54:897–901
- Dan AE, Thygesen TH, Pinholt EM: Corticosteroid administration in oral and orthognathic surgery: A systematic review of the literature and meta-analysis. *J Oral Maxillofac Surg* 2010; 68:2207–20
- De Oliveira GS Jr, Castro-Alves LJ, Ahmad S, Kendall MC, McCarthy RJ: Dexamethasone to prevent postoperative nausea and vomiting: An updated meta-analysis of randomized controlled trials. *Anesth Analg* 2013; 116:58–74
- Oray M, Abu Samra K, Ebrahimiadib N, Meese H, Foster CS: Long-term side effects of glucocorticoids. *Expert Opin Drug Saf* 2016; 15:457–65
- Bartlett R, Hartle AJ: Routine use of dexamethasone for postoperative nausea and vomiting: The case against. *Anaesthesia* 2013; 68:892–6
- Dhatariya K: II. Does dexamethasone-induced hyperglycaemia contribute to postoperative morbidity and mortality? *Br J Anaesth* 2013; 110:674–5
- Ali Khan S, McDonagh DL, Gan TJ: Wound complications with dexamethasone for postoperative nausea and vomiting prophylaxis: A moot point? *Anesth Analg* 2013; 116:966–8
- Myles PS: Stopping trials early. *Br J Anaesth* 2013; 111:133–5
- Moher D, Liberati A, Tetzlaff J, Altman DG; PRISMA Group: Preferred reporting items for systematic reviews and meta-analyses: The PRISMA statement. *BMJ* 2009; 339:b2535
- Jadad AR, Moore RA, Carroll D, Jenkinson C, Reynolds DJ, Gavaghan DJ, McQuay HJ: Assessing the quality of reports of randomized clinical trials: Is blinding necessary? *Control Clin Trials* 1996; 17:1–12
- Gan TJ, Diemunsch P, Habib AS, Kovac A, Kranke P, Meyer TA, Watcha M, Chung F, Angus S, Apfel CC, Bergese SD, Candiotti KA, Chan MT, Davis PJ, Hooper VD, Lagoo-Deenadayalan S, Myles P, Nezat G, Philip BK, Tramèr MR; Society for Ambulatory Anesthesia: Consensus guidelines for the management of postoperative nausea and vomiting. *Anesth Analg* 2014; 118:85–113
- Hozo SP, Djulbegovic B, Hozo I: Estimating the mean and variance from the median, range, and the size of a sample. *BMC Med Res Methodol* 2005; 5:13
- Mascha EJ: Alpha, beta, meta: Guidelines for assessing power and type I error in meta-analyses. *Anesth Analg* 2015; 121:1430–3
- Abdelmalak BB, Bonilla A, Mascha EJ, Maheshwari A, Tang WH, You J, Ramachandran M, Kirkova Y, Clair D, Walsh RM, Kurz A, Sessler DI: Dexamethasone, light anaesthesia, and tight glucose control (DeLiT) randomized controlled trial. *Br J Anaesth* 2013; 111:209–21
- Aldrighetti L, Pulitanò C, Arru M, Finazzi R, Catena M, Soldini L, Comotti L, Ferla G: Impact of preoperative steroids administration on ischemia-reperfusion injury and systemic responses in liver surgery: A prospective randomized study. *Liver Transpl* 2006; 12:941–9
- Backes JR, Bentley JC, Politi JR, Chambers BT: Dexamethasone reduces length of hospitalization and improves postoperative pain and nausea after total joint arthroplasty: A prospective, randomized controlled trial. *J Arthroplasty* 2013; 28(8 Suppl):11–7
- Bianchini A, De Luca A, Caminiti A: Postoperative vomiting reduction after laparoscopic cholecystectomy with single dose of dexamethasone. *Minerva Anestesiol* 2007; 73:343–6
- Bigler D, Jonsson T, Olsen J, Brenøe J, Sander-Jensen K: The effect of preoperative methylprednisolone on pulmonary function and pain after lung operations. *J Thorac Cardiovasc Surg* 1996; 112:142–5
- Bisgaard T, Klarskov B, Kehlet H, Rosenberg J: Preoperative dexamethasone improves surgical outcome after laparoscopic cholecystectomy: A randomized double-blind placebo-controlled trial. *Ann Surg* 2003; 238:651–60
- Coloma M, Duffy LL, White PF, Kendall Tongier W, Huber PJ Jr: Dexamethasone facilitates discharge after outpatient anorectal surgery. *Anesth Analg* 2001; 92:85–8
- Cowie BS, Allen KJ, Said SA, Inder WJ: Anti-emetic doses of dexamethasone suppress cortisol response in laparoscopic cholecystectomy. *Anaesth Intensive Care* 2010; 38:667–70
- Doksørd S, Sagen Ø, Nøstdahl T, Røder J: Dexamethasone does not reduce pain or analgesic consumption after thyroid surgery: a prospective, randomized trial. *Acta Anaesthesiol Scand* 2012; 56:513–9



27. Hayashi Y, Takayama T, Yamazaki S, Moriguchi M, Ohkubo T, Nakayama H, Higaki T: Validation of perioperative steroids administration in liver resection: A randomized controlled trial. *Ann Surg* 2011; 253:50–5
28. Karaman K, Bostanci EB, Aksoy E, Ulas M, Yigit T, Erdemli MO, Erçin U, Bilgihan A, Saydam G, Akoglu M: Effects of dexamethasone and pheniramine hydrogen maleate on stress response in patients undergoing elective laparoscopic cholecystectomy. *Am J Surg* 2013; 205:213–9
29. Kardash KJ, Sarrazin F, Tessler MJ, Velly AM: Single-dose dexamethasone reduces dynamic pain after total hip arthroplasty. *Anesth Analg* 2008; 106:1253–7
30. Kirdak T, Yilmazlar A, Cavun S, Ercan I, Yilmazlar T: Does single, low-dose preoperative dexamethasone improve outcomes after colorectal surgery based on an enhanced recovery protocol? Double-blind, randomized clinical trial. *Am Surg* 2008; 74:160–7
31. Koh IJ, Chang CB, Lee JH, Jeon YT, Kim TK: Preemptive low-dose dexamethasone reduces postoperative emesis and pain after TKA: A randomized controlled study. *Clin Orthop Relat Res* 2013; 471:3010–20
32. Komori K, Ishida M, Matsumoto T, Kume M, Ohta S, Takeuchi K, Onohara T, Sugimachi K: Cytokine patterns and the effects of a preoperative steroid treatment in the patients with abdominal aortic aneurysms. *Int Angiol* 1999; 18:193–7
33. Kurz A, Fleischmann E, Sessler DI, Buggy DJ, Apfel C, Akça O; Factorial Trial Investigators: Effects of supplemental oxygen and dexamethasone on surgical site infection: A factorial randomized trial. *Br J Anaesth* 2015; 115:434–43
34. Lee HW, Lee H, Chung H, Park JC, Shin SK, Lee SK, Lee YC, Hong JH, Kim DW: The efficacy of single-dose postoperative intravenous dexamethasone for pain relief after endoscopic submucosal dissection for gastric neoplasm. *Surg Endosc* 2014; 28:2334–41
35. Lunn TH, Andersen LØ, Kristensen BB, Husted H, Gaarn-Larsen L, Bandholm T, Ladelund S, Kehlet H: Effect of high-dose preoperative methylprednisolone on recovery after total hip arthroplasty: A randomized, double-blind, placebo-controlled trial. *Br J Anaesth* 2013; 110:66–73
36. Lunn TH, Kristensen BB, Andersen LØ, Husted H, Otte KS, Gaarn-Larsen L, Kehlet H: Effect of high-dose preoperative methylprednisolone on pain and recovery after total knee arthroplasty: A randomized, placebo-controlled trial. *Br J Anaesth* 2011; 106:230–8
37. Muratore A, Ribero D, Ferrero A, Bergero R, Capussotti L: Prospective randomized study of steroids in the prevention of ischaemic injury during hepatic resection with pedicle clamping. *Br J Surg* 2003; 90:17–22
38. Murphy GS, Szokol JW, Avram MJ, Greenberg SB, Shear T, Vender JS, Gray J, Landry E: The effect of single low-dose dexamethasone on blood glucose concentrations in the perioperative period: A randomized, placebo-controlled investigation in gynecologic surgical patients. *Anesth Analg* 2014; 118:1204–12
39. Nagelschmidt M, Fu ZX, Saad S, Dimmeler S, Neugebauer E: Preoperative high dose methylprednisolone improves patients outcome after abdominal surgery. *Eur J Surg* 1999; 165:971–8
40. Nazar CE, Lacassie HJ, López RA, Muñoz HR: Dexamethasone for postoperative nausea and vomiting prophylaxis: Effect on glycaemia in obese patients with impaired glucose tolerance. *Eur J Anaesthesiol* 2009; 26:318–21
41. Pulitanò C, Aldrighetti L, Arru M, Finazzi R, Soldini L, Catena M, Ferla G: Prospective randomized study of the benefits of preoperative corticosteroid administration on hepatic ischemia-reperfusion injury and cytokine response in patients undergoing hepatic resection. *HPB (Oxford)* 2007; 9:183–9
42. Rahimzadeh P, Imani F, Faiz SH, Nikoubakht N, Sayarifard A: Effect of intravenous methylprednisolone on pain after intertrochanteric femoral fracture surgery. *J Clin Diagn Res* 2014; 8:GC01–4
43. Sato N, Koeda K, Ikeda K, Kimura Y, Aoki K, Iwaya T, Akiyama Y, Ishida K, Saito K, Endo S: Randomized study of the benefits of preoperative corticosteroid administration on the postoperative morbidity and cytokine response in patients undergoing surgery for esophageal cancer. *Ann Surg* 2002; 236:184–90
44. Schietroma M, Cecilia EM, Carlei F, Sista F, De Santis G, Lancione L, Amicucci G: Dexamethasone for the prevention of recurrent laryngeal nerve palsy and other complications after thyroid surgery: A randomized double-blind placebo-controlled trial. *JAMA Otolaryngol Head Neck Surg* 2013; 139:471–8
45. Schietroma M, Giuliani M, Zoccali G, Carlei F, Carnei F, Bianchi Z, Amicucci G, Amicucci G, Daniloiu AG: How does dexamethasone influence surgical outcome after laparoscopic Nissen fundoplication? A randomized double-blind placebo-controlled trial. *Updates Surg* 2010; 62:47–54
46. Schmidt SC, Hamann S, Langrehr JM, Höflich C, Mittler J, Jacob D, Neuhaus P: Preoperative high-dose steroid administration attenuates the surgical stress response following liver resection: Results of a prospective randomized study. *J Hepatobiliary Pancreat Surg* 2007; 14:484–92
47. Schulze S, Andersen J, Overgaard H, Nørgaard P, Nielsen HJ, Aasen A, Gottrup F, Kehlet H: Effect of prednisolone on the systemic response and wound healing after colonic surgery. *Arch Surg* 1997; 132:129–35
48. Simsa J, Magnusson N, Hedberg M, Lorentz T, Gunnarsson U, Sandblom G: Betamethasone in hernia surgery: A randomized controlled trial. *Eur J Pain* 2013; 17:1511–6
49. Singh PP, Lemanu DP, Taylor MH, Hill AG: Association between preoperative glucocorticoids and long-term survival and cancer recurrence after colectomy: Follow-up analysis of a previous randomized controlled trial. *Br J Anaesth* 2014; 113(Suppl 1):i68–73
50. Snäll J, Kormi E, Lindqvist C, Suominen AL, Mesimäki K, Törnwall J, Thorén H: Impairment of wound healing after operative treatment of mandibular fractures, and the influence of dexamethasone. *Br J Oral Maxillofac Surg* 2013; 51:808–12
51. Takeda S, Ogawa R, Nakanishi K, Kim C, Miyashita M, Sasajima K, Onda M, Takano T: The effect of preoperative high dose methylprednisolone in attenuating the metabolic response after oesophageal resection. *Eur J Surg* 1997; 163:511–7
52. Turner S, Derham C, Orsi NM, Bosomworth M, Bellamy MC, Howell SJ: Randomized clinical trial of the effects of methylprednisolone on renal function after major vascular surgery. *Br J Surg* 2008; 95:50–6
53. Turner S, Dhamarajah S, Bosomworth M, Bellamy MC; Leeds Liver Transplant Group: Effect of perioperative steroids on renal function after liver transplantation. *Anaesthesia* 2006; 61:253–9
54. Vignali A, Di Palo S, Orsenigo E, Ghirardelli L, Radaelli G, Staudacher C: Effect of prednisolone on local and systemic response in laparoscopic vs. open colon surgery: A randomized, double-blind, placebo-controlled trial. *Dis Colon Rectum* 2009; 52:1080–8
55. Yamashita Y, Shimada M, Hamatsu T, Rikimaru T, Tanaka S, Shirabe K, Sugimachi K: Effects of preoperative steroid administration on surgical stress in hepatic resection: Prospective randomized trial. *Arch Surg* 2001; 136:328–33
56. Yano M, Taniguchi M, Tsujinaka T, Fujiwara Y, Yasuda T, Shiozaki H, Monden M: Is preoperative methylprednisolone beneficial for patients undergoing esophagectomy? *Hepatogastroenterology* 2005; 52:481–5
57. Zargar-Shoshtari K, Sammour T, Kahokehr A, Connolly AB, Hill AG: Randomized clinical trial of the effect of glucocorticoids on peritoneal inflammation and postoperative recovery after colectomy. *Br J Surg* 2009; 96:1253–61

58. Zotti GC, Salzano de Luna F, Caiazza A, Santaniello W, Micheletti G, Bruno A, Casadei CL: Prevention of pulmonary complications by 6-methylprednisolone in major abdominal surgery. *Ital J Surg Sci* 1988; 18:369–75
59. Feo CV, Sortini D, Ragazzi R, De Palma M, Liboni A: Randomized clinical trial of the effect of preoperative dexamethasone on nausea and vomiting after laparoscopic cholecystectomy. *Br J Surg* 2006; 93:295–9
60. Fukami Y, Terasaki M, Okamoto Y, Sakaguchi K, Murata T, Ohkubo M, Nishimae K: Efficacy of preoperative dexamethasone in patients with laparoscopic cholecystectomy: A prospective randomized double-blind study. *J Hepatobiliary Pancreat Surg* 2009; 16:367–71
61. Hyrkäs T: Effect of preoperative single doses of diclofenac and methylprednisolone on wound healing. *Scand J Plast Reconstr Surg Hand Surg* 1994; 28:275–8
62. Kargi E, Hoşnüter M, Babuçcu O, Altunkaya H, Altinyazar C: Effect of steroids on edema, ecchymosis, and intraoperative bleeding in rhinoplasty. *Ann Plast Surg* 2003; 51:570–4
63. Koc S, Gürbüzler L, Yaman H, Eyibilen A, Süren M, Kaya Z, Yelken K, Aladağ I: The effectiveness of steroids for edema, ecchymosis, and intraoperative bleeding in rhinoplasty. *Am J Rhinol Allergy* 2011; 25:e95–8
64. Marion DW, Jannetta PJ: Use of perioperative steroids with microvascular decompression operations. *Neurosurgery* 1988; 22:353–7
65. Mathiesen O, Jørgensen DG, Hilsted KL, Trolle W, Stjernholm P, Christiansen H, Hjortso NC, Dahl JB: Pregabalin and dexamethasone improves post-operative pain treatment after tonsillectomy. *Acta Anaesthesiol Scand* 2011; 55:297–305
66. Nielsen RV, Siegel H, Fomsgaard JS, Andersen JD, Martusevicius R, Mathiesen O, Dahl JB: Preoperative dexamethasone reduces acute but not sustained pain after lumbar disk surgery: A randomized, blinded, placebo-controlled trial. *Pain* 2015; 156:2538–44
67. Reikerås O, Helle A, Krohn CD, Brox JI: Cytokine responses to glucocorticoids and surgery: A randomized controlled trial. *Eur J Trauma Emerg Surg* 2008; 34:141–7
68. Rendina EA, Venuta F, Ricci C: Effects of low-dose steroids on bronchial healing after sleeve resection. A clinical study. *J Thorac Cardiovasc Surg* 1992; 104:888–91
69. Sánchez-Rodríguez PE, Fuentes-Orozco C, González-Ojeda A: Effect of dexamethasone on postoperative symptoms in patients undergoing elective laparoscopic cholecystectomy: Randomized clinical trial. *World J Surg* 2010; 34:895–900
70. Thangaswamy CR, Rewari V, Trikha A, Dehnan M, Chandralekha: Dexamethasone before total laparoscopic hysterectomy: A randomized controlled dose-response study. *J Anesth* 2010; 24:24–30
71. Worni M, Schudel HH, Seifert E, Inglin R, Hagemann M, Vorburger SA, Candinas D: Randomized controlled trial on single dose steroid before thyroidectomy for benign disease to improve postoperative nausea, pain, and vocal function. *Ann Surg* 2008; 248:1060–6
72. Kara CO, Gökalan I: Effects of single-dose steroid usage on edema, ecchymosis, and intraoperative bleeding in rhinoplasty. *Plast Reconstr Surg* 1999; 104:2213–8
73. Jules-Elysee KM, Wilfred SE, Memtsoudis SG, Kim DH, YaDeau JT, Urban MK, Lichardi ML, McLawhorn AS, Sculco TP: Steroid modulation of cytokine release and desmosine levels in bilateral total knee replacement: A prospective, double-blind, randomized controlled trial. *J Bone Joint Surg Am* 2012; 94:2120–7
74. Abdelmalak BB, Bonilla AM, Yang D, Chowdary HT, Gottlieb A, Lyden SP, Sessler DI: The hyperglycemic response to major noncardiac surgery and the added effect of steroid administration in patients with and without diabetes. *Anesth Analg* 2013; 116:1116–22
75. Khuri SF, Henderson WG, DePalma RG, Mosca C, Healey NA, Kumbhani DJ; Participants in the VA National Surgical Quality Improvement Program: Determinants of long-term survival after major surgery and the adverse effect of postoperative complications. *Ann Surg* 2005; 242:326–41; discussion 341–3
76. De Oliveira GS Jr, Castro Alves LJ, Nader A, Kendall MC, Rahangdale R, McCarthy RJ: Perineural dexamethasone to improve postoperative analgesia with peripheral nerve blocks: A meta-analysis of randomized controlled trials. *Pain Res Treat* 2014; 2014:179029
77. Murphy GS, Szokol JW, Greenberg SB, Avram MJ, Vender JS, Nisman M, Vaughn J: Preoperative dexamethasone enhances quality of recovery after laparoscopic cholecystectomy: Effect on in-hospital and postdischarge recovery outcomes. *ANESTHESIOLOGY* 2011; 114:882–90
78. Waldron NH, Jones CA, Gan TJ, Allen TK, Habib AS: Impact of perioperative dexamethasone on postoperative analgesia and side-effects: Systematic review and meta-analysis. *Br J Anaesth* 2013; 110:191–200
79. Sauerland S, Nagelschmidt M, Mallmann P, Neugebauer EA: Risks and benefits of preoperative high dose methylprednisolone in surgical patients: A systematic review. *Drug Saf* 2000; 23:449–61
80. Turan A, Sessler DI: Steroids to ameliorate postoperative pain. *ANESTHESIOLOGY* 2011; 115:457–9
81. Percival VG, Riddell J, Corcoran TB: Single dose dexamethasone for postoperative nausea and vomiting—a matched case-control study of postoperative infection risk. *Anaesth Intensive Care* 2010; 38:661–6
82. Corcoran TB, Truysens EB, Ng A, Moseley N, Doyle AC, Doyle AR, Margetts L: Anti-emetic dexamethasone and postoperative infection risk: A retrospective cohort study. *Anaesth Intensive Care* 2010; 38:654–60
83. Bagdade JD, Root RK, Bulger RJ: Impaired leukocyte function in patients with poorly controlled diabetes. *Diabetes* 1974; 23:9–15
84. Edwards FH, Grover FL, Shroyer AL, Schwartz M, Bero J: The Society of Thoracic Surgeons National Cardiac Surgery Database: Current risk assessment. *Ann Thorac Surg* 1997; 63:903–8
85. Kotagal M, Symons RG, Hirsch IB, Umpierrez GE, Dellinger EP, Farrokhi ET, Flum DR; SCOAP-CERTAIN Collaborative: Perioperative hyperglycemia and risk of adverse events among patients with and without diabetes. *Ann Surg* 2015; 261:97–103
86. Abdelmalak BB, Knittel J, Abdelmalak JB, Dalton JE, Christiansen E, Foss J, Argalious M, Zimmerman R, Van den Berghe G: Preoperative blood glucose concentrations and postoperative outcomes after elective non-cardiac surgery: An observational study. *Br J Anaesth* 2014; 112:79–88
87. Kiran RP, Turina M, Hammel J, Fazio V: The clinical significance of an elevated postoperative glucose value in nondiabetic patients after colorectal surgery: Evidence for the need for tight glucose control? *Ann Surg* 2013; 258:599–604; discussion 604–5
88. Kwon S, Thompson R, Dellinger P, Yanez D, Farrokhi E, Flum D: Importance of perioperative glycemic control in general surgery: A report from the Surgical Care and Outcomes Assessment Program. *Ann Surg* 2013; 257:8–14
89. Srinivasa S, Kahokehr AA, Yu TC, Hill AG: Preoperative glucocorticoid use in major abdominal surgery: Systematic review and meta-analysis of randomized trials. *Ann Surg* 2011; 254:183–91
90. Udelsman R, Ciarleglio M: Glucocorticoids: The devil is in the details. *Ann Surg* 2011; 254:192–3
91. Hennekens CH, Demets D: The need for large-scale randomized evidence without undue emphasis on small trials, meta-analyses, or subgroup analyses. *JAMA* 2009; 302:2361–2

92. Goldfarb M, Drudi L, Almohammadi M, Langlois Y, Noiseux N, Perrault L, Piazza N, Afilalo J: Outcome reporting in cardiac surgery trials: Systematic review and critical appraisal. *J Am Heart Assoc* 2015; 4:e002204
93. Huedo-Medina TB, Sánchez-Meca J, Marín-Martínez F, Botella J: Assessing heterogeneity in meta-analysis: Q statistic or I<sup>2</sup> index? *Psychol Methods* 2006; 11:193–206
94. Doi SA, Barendregt JJ, Khan S, Thalib L, Williams GM: Advances in the meta-analysis of heterogeneous clinical trials II: The quality effects model. *Contemp Clin Trials* 2015; 45(Pt A):123–9
95. Doi SA, Barendregt JJ, Khan S, Thalib L, Williams GM: Advances in the meta-analysis of heterogeneous clinical trials I: The inverse variance heterogeneity model. *Contemp Clin Trials* 2015; 45(Pt A):130–8

## ANESTHESIOLOGY REFLECTIONS FROM THE WOOD LIBRARY-MUSEUM

### Colón-Morales and His Apgar Score Timing Units

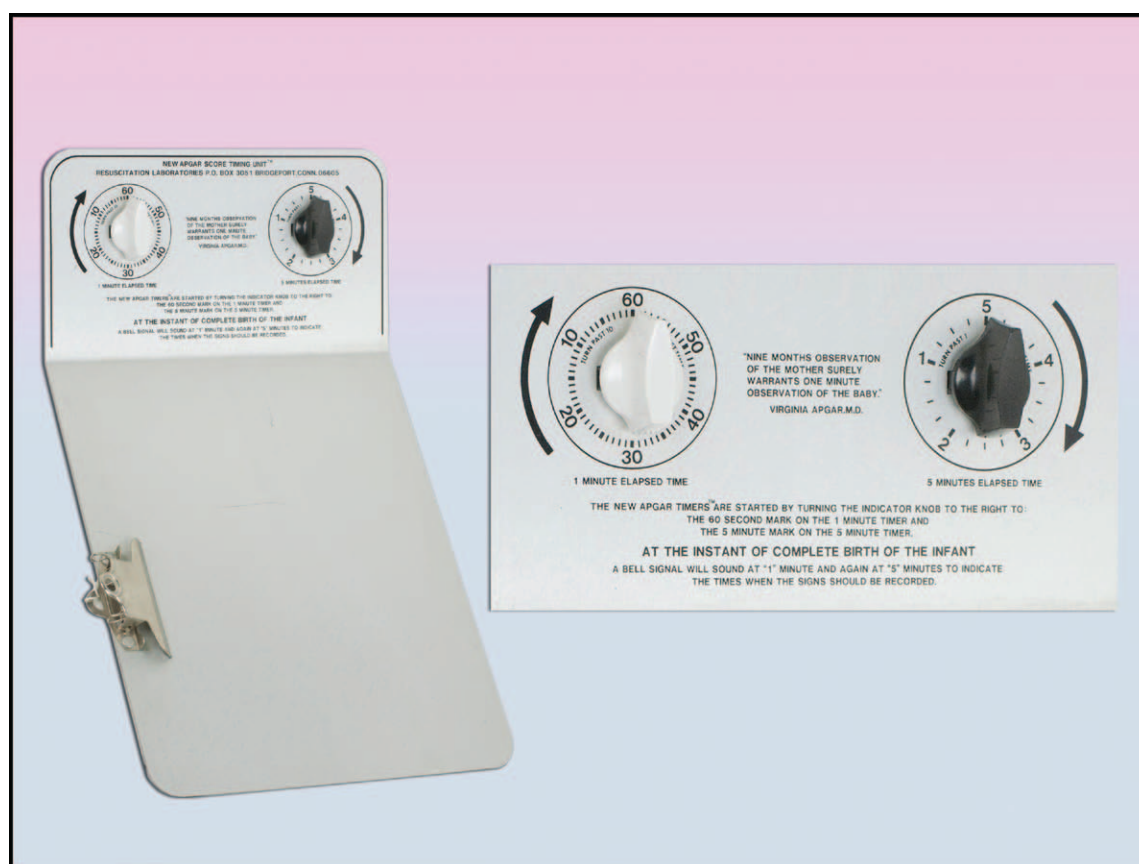

Physicians and many laypeople are familiar with the 1- and 5-min Apgar scoring system for screening the health of newborns, a system named after anesthesiologist Virginia Apgar, M.D. Her original screening system was simplified in 1962 to the acronym APGAR for the neonate's Appearance (color), Pulse (heart rate), Grimace (reflex irritability), Activity (muscle tone), and Respiration. At a meeting in New York in 1968, an anesthesiologist named Miguel Angel Colón-Morales, M.D., displayed his "Apgar Score Timing Unit" as a single timer mounted on a clipboard. In June 1969, he filed a U.S. patent application for that invention as a "Device for monitoring physiological phenomenon." One year later, he was granted U.S. Patent No. 3517636. A later version of his invention featured not one, but two timers (*right*), and was dubbed (*left*) the "New Apgar Score Timing Unit." (Copyright © the American Society of Anesthesiologists' Wood Library-Museum of Anesthesiology.)

George S. Bause, M.D., M.P.H., *Honorary Curator and Laureate of the History of Anesthesia, Wood Library-Museum of Anesthesiology, Schaumburg, Illinois, and Clinical Associate Professor, Case Western Reserve University, Cleveland, Ohio. UJYC@aol.com.*
